# Supplementary material
Source: publisher figshare collection journal article supplement (https://frontiersin.figshare.com/ndownloader/files/25484282)
Supplement: Supplementary file [file 25484282]

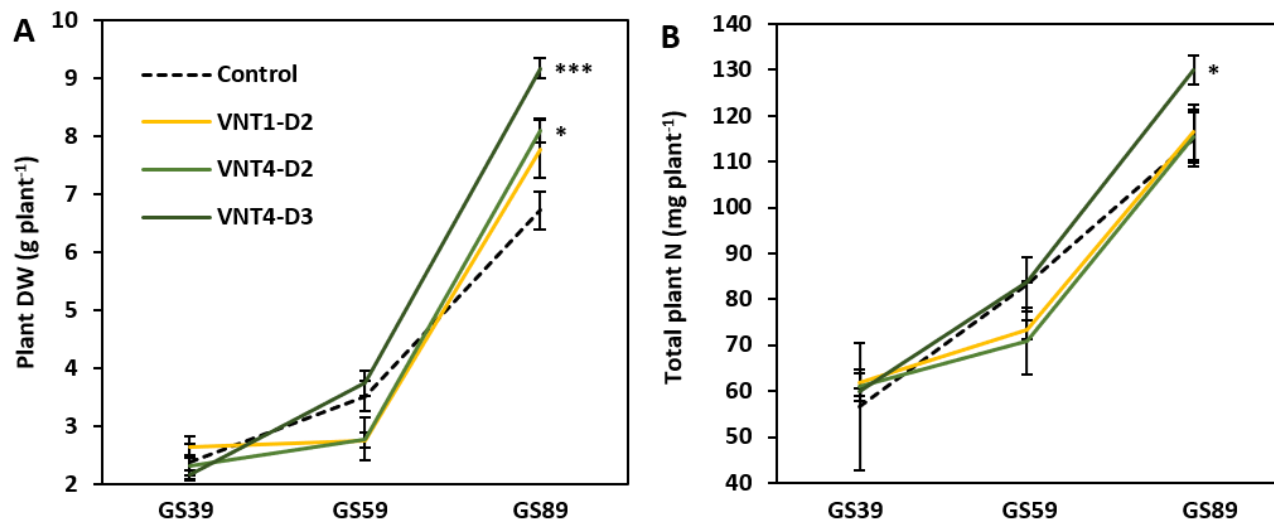

**Supplementary Figure 2. Effect of biostimulant formulations mixed with N fertilizer on plant DW and total plant N at the tillering, heading and maturity stages in wheat (*Triticum aestivum* L.).** (A) Plant dry weight dynamics, and (B) total plant N dynamics. Plant culture was carried out under semi-hydroponic conditions on a sand/perlite (1/1) substrate (see Materials and methods for details). N was provided at tillering (eq. 50 kgN ha<sup>-1</sup>), the 2.5 cm head stage (eq. 80 kgN ha<sup>-1</sup>) and heading (eq. 20 kgN ha<sup>-1</sup>). VNT1 and VNT4 (see Table 1 for composition of each) were mixed with N fertilizer at different doses: dose 2 was 166 mL kgN<sup>-1</sup> and dose 3 was the equivalent of 3 x 5 L ha<sup>-1</sup>. Dose 3 was tested only with VNT4. Plants were harvested at emergence of the last visible leaf (GS39), heading (GS59) and maturity (GS89). Bars indicate means  $\pm$  SE. Different letters denote significant differences according to Fisher's test ( $p < 0.05$ ;  $n = 3$ ).
